# Supplementary material for: Coregulation and modulation of NFκB-related genes in celiac disease: uncovered aspects of gut mucosal inflammation
Source: PubMed Central journal article supplement — Hum Mol Genet. 2013 Oct 24;23(5):1298–310. doi: 10.1093/hmg/ddt520 (PMC3919015; doi:10.1093/hmg/ddt520), 2013-10-24
Supplement: supp_ddt520_ddt520supp.pdf [file supp_ddt520_ddt520supp.pdf]

## Supplementary material

**Supplementary table 1.** List of the 93 Assay IDs included in the custom-designed Taqman Low Density Array (TLDA) with their corresponding gene symbols.

| Assay ID      | Gene Symbol    | Assay ID      | Gene Symbol      | Assay ID      | Gene Symbol      |
|---------------|----------------|---------------|------------------|---------------|------------------|
| Hs00178289_m1 | <i>AKT1</i>    | Hs00174092_m1 | <i>IL1A</i>      | Hs00153294_m1 | <i>RELA</i>      |
| Hs00184839_m1 | <i>BCL10</i>   | Hs00174097_m1 | <i>IL1B</i>      | Hs00232399_m1 | <i>RELB</i>      |
| Hs00608023_m1 | <i>BCL2</i>    | Hs00168392_m1 | <i>IL1R1</i>     | Hs00169407_m1 | <i>RIPK1</i>     |
| Hs00180403_m1 | <i>BCL3</i>    | Hs00174114_m1 | <i>IL2</i>       | Hs00174057_m1 | <i>SELE</i>      |
| Hs00977611_g1 | <i>BIRC5</i>   | Hs00907779_m1 | <i>IL2RA</i>     | Hs00234829_m1 | <i>STAT1</i>     |
| Hs00182707_m1 | <i>BTRC</i>    | Hs00174131_m1 | <i>IL6</i>       | Hs00179410_m1 | <i>TBK1</i>      |
| Hs00367225_m1 | <i>CARD10</i>  | Hs00174103_m1 | <i>IL8</i>       | Hs00413978_m1 | <i>TLR1</i>      |
| Hs00364499_m1 | <i>CARD14</i>  | Hs00155570_m1 | <i>IRAK1</i>     | Hs00152932_m1 | <i>TLR2</i>      |
| Hs00234140_m1 | <i>CCL2</i>    | Hs00418138_m1 | <i>IRAK1BP1</i>  | Hs00152933_m1 | <i>TLR3</i>      |
| Hs00171125_m1 | <i>CCL20</i>   | Hs00176394_m1 | <i>IRAK2</i>     | Hs00152939_m1 | <i>TLR4</i>      |
| Hs00374176_m1 | <i>CD40</i>    | Hs00236874_m1 | <i>LTA</i>       | Hs00271977_s1 | <i>TLR6</i>      |
| Hs00188486_m1 | <i>CD83</i>    | Hs00158922_m1 | <i>LTBR</i>      | Hs00152971_m1 | <i>TLR7</i>      |
| Hs00989507_m1 | <i>CHUK</i>    | Hs00198984_m1 | <i>MALT1</i>     | Hs00607866_mH | <i>TLR8</i>      |
| Hs00231713_m1 | <i>CREB1</i>   | Hs00394890_m1 | <i>MAP3K1</i>    | Hs00152973_m1 | <i>TLR9</i>      |
| Hs00231733_m1 | <i>CREBBP</i>  | Hs00177695_m1 | <i>MAP3K14</i>   | Hs00174128_m1 | <i>TNF</i>       |
| Hs00174164_m1 | <i>CSF1</i>    | Hs00177373_m1 | <i>MAP3K7</i>    | Hs00234713_m1 | <i>TNFAIP3</i>   |
| Hs00171266_m1 | <i>CSF2</i>    | Hs00196143_m1 | <i>MAP3K7IP1</i> | Hs00269492_m1 | <i>TNFRSF10A</i> |
| Hs00738431_g1 | <i>CSF3</i>    | Hs00153408_m1 | <i>MYC</i>       | Hs00366272_m1 | <i>TNFRSF10B</i> |
| Hs00236937_m1 | <i>CXCL1</i>   | Hs00182082_m1 | <i>MYD88</i>     | Hs00187192_m1 | <i>TNFRSF11A</i> |
| Hs00369830_m1 | <i>EDARADD</i> | Hs00765730_m1 | <i>NFKB1</i>     | Hs01042313_m1 | <i>TNFRSF1A</i>  |
| Hs00196470_m1 | <i>ENPP2</i>   | Hs00174517_m1 | <i>NFKB2</i>     | Hs00243522_m1 | <i>TNFSF11</i>   |
| Hs00538709_m1 | <i>FADD</i>    | Hs00153283_m1 | <i>NFKBIA</i>    | Hs00353710_s1 | <i>TNFSF15</i>   |
| Hs00181225_m1 | <i>FASLG</i>   | Hs00182115_m1 | <i>NFKBIB</i>    | Hs00182558_m1 | <i>TRADD</i>     |
| Hs99999908_m1 | <i>GUSB</i>    | Hs00234431_m1 | <i>NFKBIE</i>    | Hs00194638_m1 | <i>TRAF1</i>     |
| Hs00164932_m1 | <i>ICAM1</i>   | Hs00384611_m1 | <i>NKIRAS1</i>   | Hs00184186_m1 | <i>TRAF2</i>     |
| Hs00277234_s1 | <i>IER3</i>    | Hs00383387_m1 | <i>NKIRAS2</i>   | Hs00237035_m1 | <i>TRAF3</i>     |
| Hs00233284_m1 | <i>IKBKB</i>   | Hs00167248_m1 | <i>NOS2</i>      | Hs00188755_m1 | <i>TRAF4</i>     |
| Hs00415849_m1 | <i>IKBKG</i>   | Hs00265399_s1 | <i>PTAFR</i>     | Hs00182979_m1 | <i>TRAF5</i>     |
| Hs00174086_m1 | <i>IL10</i>    | Hs00610420_m1 | <i>PTGES</i>     | Hs00365486_m1 | <i>VCAM1</i>     |
| Hs00168405_m1 | <i>IL12A</i>   | Hs00153133_m1 | <i>PTGS2</i>     | Hs00185658_m1 | <i>ZFP36</i>     |
| Hs00233688_m1 | <i>IL12B</i>   | Hs00968436_m1 | <i>REL</i>       | Hs00603247_m1 | <i>ZNF675</i>    |

**Supplementary table 2.** Methylation assay list.

| <i>Gene symbol</i> | Methylation  |
|--------------------|--------------|
|                    | Assay Number |
| <i>MALT1</i>       | PM00185143   |
| <i>MAP3K7</i>      | PM00122850   |
| <i>MAP3K7IP1</i>   | PM00199521   |
| <i>MAP3K14</i>     | PM00177569   |
| <i>NFKBIA</i>      | PM00056287   |
| <i>RELA</i>        | PM00048895   |
| <i>TNFAIP3</i>     | PM00122129   |
| <i>TRADD</i>       | PM00061369   |

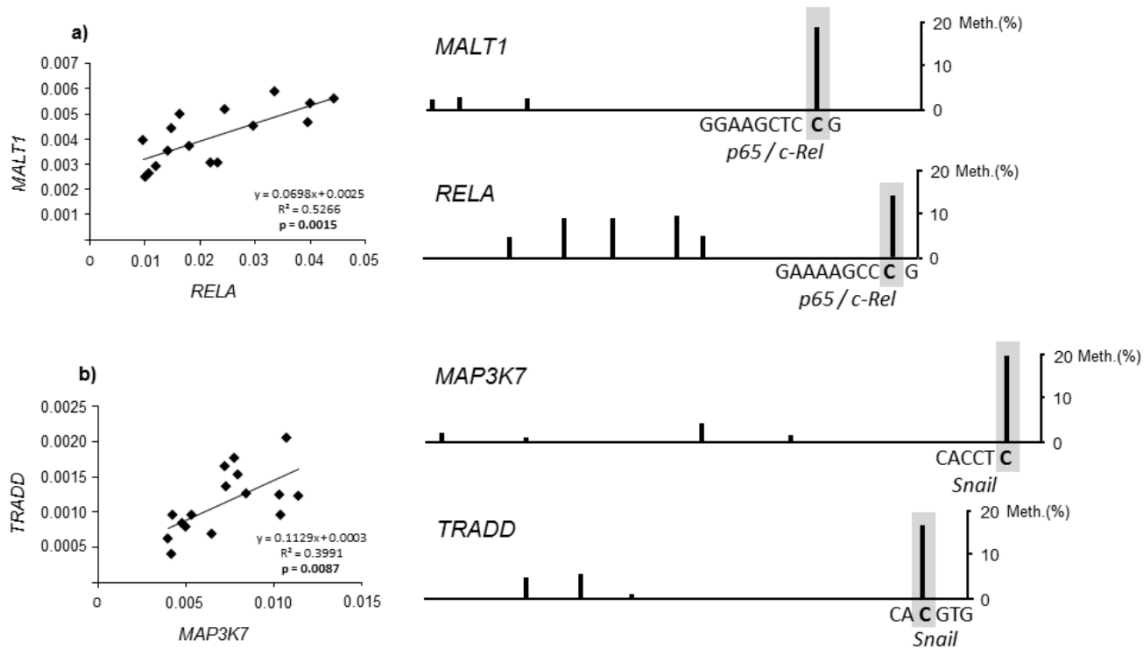

**Supplementary figure 1.** Correlation of expression in controls between gene pairs (**a** and **b** for *MALT1-RELA* and *MAP3K7-TRADD*, respectively) sharing *in silico* identified TFBS affected by the most methylated CpGs of the analyzed *loci*.

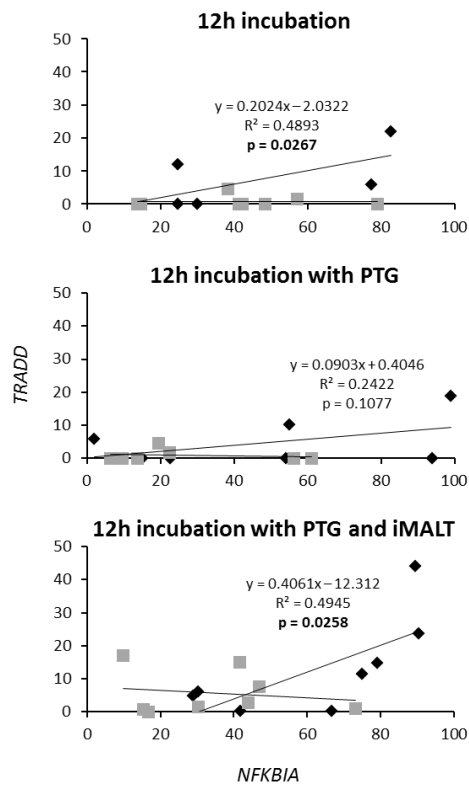

**Supplementary figure 2.** Establishment of correlation between methylation levels of *NFKBIA* and *TRADD* in active (black circles) and treated (white circles) CD patients after 12 h incubations in a) medium alone, b) in the presence of 250  $\mu\text{g/ml}$  PTG and c) with PTG and 60  $\mu\text{g/ml}$  Z.
